# Supplementary material for: Health Risks of Limited-Contact Water Recreation
Source: PubMed Central journal article supplement (PMC3279449; doi:10.1289/ehp.1103934), 2011-10-26

## SUPPLEMENTARY MATERIAL

### Health Risks of Limited-contact Water Recreation

Samuel Dorevitch, Preethi Pratap,, Meredith Wroblewski, Daniel O. Hryhorczuk, Hong Li, Li C. Liu, Peter A. Scheff

#### List of supplementary material

1. Supplementary Material, Table 1: Potential confounders and effect modifiers
2. Supplementary Material, Table 2a: results of multivariate logistic regression model of AGI
3. Supplementary Material, Table 2b: results of multivariate logistic regression model of ARI
4. Supplementary Material, Table 2c: results of multivariate logistic regression model of ear symptoms
5. Supplementary Material, Table 2d: results of multivariate logistic regression model of eye symptoms
6. Supplementary Material, Table 2e: results of multivariate logistic regression model of skin rash
7. Supplementary Material, Table 3: alternative definitions of exposure in analyses of 2-group models of AGI
8. Supplementary Material, Figure 1: CHEERS recruiting locations (North: Figure 1a, and South, Figure 1b)
9. Supplementary Material, Figure 2: Participant Enrolment and Attrition
10. Supplementary material, Figure 3a: Survival curve, acute respiratory illness (ARI)
11. Supplementary material, Figure 3b: Survival curve, ear symptoms
12. Supplementary material, Figure 3c: Survival curve, eye symptoms
13. Supplementary material, Figure 3d: Survival curve, skin rash

**Supplementary Material Table 1: Potential confounders and effect modifiers**

| <b>Potential confounders and effect modifiers of associations between study group and outcome</b> | <b>AGI</b> | <b>ARI</b> | <b>Ear</b> | <b>Eye</b> | <b>Skin</b> |
|---------------------------------------------------------------------------------------------------|------------|------------|------------|------------|-------------|
|                                                                                                   |            |            |            |            |             |
| Age category                                                                                      | C, E       | C, E       | C, E       | C, E       | C, E        |
| Gender                                                                                            | C          | C          | C          | C          | C           |
| Race/ethnicity                                                                                    | C          | C          | C          | C          | C           |
| Recent contact with dog, cat                                                                      | C          | C          |            |            | C           |
| Recent contact with other animals                                                                 | C          | C          |            |            |             |
| Recently ate shell fish, sushi                                                                    | C          |            |            |            | C           |
| Recently ate undercooked meat                                                                     | C          |            |            |            |             |
| Recently ate raw/runny eggs                                                                       | C          |            |            |            |             |
| Recently ate packaged sandwich                                                                    | C          |            |            |            |             |
| Recently ate hamburger                                                                            | C          |            |            |            |             |
| Chronic GI condition                                                                              | C, E       | C          |            |            |             |
| Baseline average number of bowel movements/day                                                    | C, E       |            |            |            |             |
| Chronic respiratory condition                                                                     |            | C, E       | C          |            |             |
| Recent contact with someone who has GI symptoms                                                   | C          |            | C          | C          |             |
| Recent contact with someone who has respiratory symptoms                                          |            | C          |            | C          |             |
| Recent contact with someone who has eye symptoms                                                  |            |            |            | C          |             |
| Diabetes                                                                                          | C, E       | C, E       | C, E       | C, E       | C, E        |
| Recent antibiotic use                                                                             | C          | C          |            |            | C           |
| Recent antacid use                                                                                | C          | C          |            |            |             |
| Prone to infection                                                                                | C, E       | C, E       | C, E       | C, E       | C, E        |
| Pre-existing bug bites, cuts or sunburn                                                           |            |            |            |            | C           |
| Eating, hand washing during recreation                                                            | C          | C          |            |            |             |
| Water recreation during follow-up                                                                 | C          | C          | C          | C          | C           |
| Perceived risk of CAWS recreation                                                                 | C, E       | C, E       | C, E       | C, E       | C           |
| Frequency of recreation at location of enrollment                                                 | C          | C          | C          | C          | C           |

C: Potential confounder, E: Potential effect modifier

**Supplementary Material Table 2a: results of multivariate logistic regression model of AGI**

| Predictor                                | Ref./scale       | <u>All three groups</u> |            | <u>Water recreators only</u> |             |
|------------------------------------------|------------------|-------------------------|------------|------------------------------|-------------|
|                                          |                  | OR                      | 95% CI     | OR                           | 95% CI      |
| CAWS group                               | UNX              | 1.46*                   | 1.08, 1.96 |                              |             |
| G UW group                               | UNX              | 1.50*                   | 1.09, 2.07 |                              |             |
| CAWS group                               | G UW             |                         |            | 1.02                         | 0.80, 1.31  |
| Age ≤10 yr                               | 11-64 yrs        | 0.54*                   | 0.32, 0.90 | 0.42*                        | 0.22, 0.80  |
| Age ≥65 yrs                              | 11-64 yrs        | 0.33*                   | 0.15, 0.70 | 0.40*                        | 0.17, 0.92  |
| Male                                     | Female           | 0.77*                   | 0.63, 0.95 | 0.75*                        | 0.59, 0.95  |
| White                                    | African Amer.    | 0.50**                  | 0.36, 0.68 | 0.55*                        | 0.35, 0.87  |
| Hispanic                                 | African Amer.    | 0.72                    | 0.47, 1.10 | 0.72                         | 0.40, 1.29  |
| Other                                    | African Amer.    | 0.62*                   | 0.41, 0.94 | 0.69                         | 0.39, 1.20  |
| Same water use: 5-10 days                | 0-4 days         | 1.46*                   | 1.10, 1.95 | 1.34                         | 0.95, 1.90  |
| Same water use: >10 days                 | 0-4 days         | 0.86                    | 0.61, 1.20 | 0.77                         | 0.50, 1.19  |
| Contact with person w/ GI ‡‡             | None             | 1.32                    | 0.84, 2.06 | 1.41                         | 0.82, 2.44  |
| Chronic GI condition                     | None             | 2.11**                  | 1.44, 3.08 | 2.43**                       | 1.57, 3.74  |
| Perceived risk of CAWS recreation        | 0-10 scale       | 1.08**                  | 1.04, 1.12 | 1.08*                        | 1.03, 1.12  |
| Baseline avg. # of daily bowel movements | 0-3              | 1.29*                   | 1.11, 1.49 | 1.23*                        | 1.03, 1.46  |
| Dog or cat contact ‡                     | None             | 0.97                    | 0.78, 1.19 | 0.89                         | 0.70, 1.14  |
| Other animal contact ‡                   | None             | 1.22                    | 0.86, 1.75 | 0.96                         | 0.62, 1.48  |
| Are raw/undercooked eggs ‡               | None             | 1.18                    | 0.75, 1.87 | 1.05                         | 0.59, 1.88  |
| Ate raw/undercooked meat ‡               | None             | 1.07                    | 0.67, 1.73 | 1.41                         | 0.84, 2.38  |
| Ate hamburger ‡                          | None             | 1.23                    | 0.99, 1.53 | 1.19                         | 0.92, 1.54  |
| Ate fresh fruit/vegetable ‡              | None             | 0.90                    | 0.65, 1.23 | 0.80                         | 0.56, 1.15  |
| Ate shellfish, sushi ‡                   | None             | 1.08                    | 0.72, 1.60 | 1.03                         | 0.63, 1.69  |
| Ate pre-packaged sandwich ‡              | None             | 1.41                    | 0.97, 2.06 | 1.26                         | 0.80, 1.98  |
| Has diabetes                             | Does not         | 1.46                    | 0.87, 2.45 | 0.83                         | 0.40, 1.75  |
| Took antibiotics in past 7 days          | No               | 1.18                    | 0.74, 1.86 | 0.88                         | 0.47, 1.64  |
| Is prone to infection                    | Not              | 0.84                    | 0.45, 1.57 | 0.66                         | 0.28, 1.54  |
| Anta95% CId use in past 48 hours         | None             | 1.30                    | 0.92, 1.83 | 1.24                         | 0.83, 1.84  |
| Water recreation, follow-up days 0-3     | None             | 1.12                    | 0.87, 1.44 | 0.95                         | 0.69, 1.30  |
| Ate/drank, washed hands                  | Didn't eat/drink | 0.92                    | 0.66, 1.28 | 0.85                         | 0.60, 1.19  |
| Ate/drank, did not wash hands            | Didn't eat/drink | 0.94                    | 0.72, 1.23 | 0.95                         | 0.72, 1.25  |
| Canoeing                                 | Motor boating    |                         | N/A        | 0.74                         | 0.50, 1.10  |
| Kayaking/rafting                         | Motor boating    |                         | N/A        | 0.73                         | 0.50, 1.07  |
| Rowing                                   | Motor boating    |                         | N/A        | 0.47*                        | 0.27, 0.82  |
| Fishing                                  | Motor boating    |                         | N/A        | 1.04                         | 0.67, 1.61  |
| Swallowed ≥mouthful of water             | Did not          |                         | N/A        | 5.74*                        | 2.05, 16.04 |

‡ Acute gastrointestinal Illness (AGI) \*2-sided P value <0.05; \*\*<0.001

‡ ‡ Past 72 hours

**Supplementary Material, Table 2b: results of multivariate logistic regression model of ARI**

| Predictor                                | Ref./scale       | All three groups |            | Water recreation groups |             |
|------------------------------------------|------------------|------------------|------------|-------------------------|-------------|
|                                          |                  | OR               | 95% CI     | OR                      | 95% CI      |
| CAWS group                               | UNX group        | 0.90             | 0.57, 1.42 |                         |             |
| G UW group                               | UNX group        | 1.04             | 0.65, 1.67 |                         |             |
| CAWS group                               | G UW group       |                  |            | 0.94                    | 0.64, 1.38  |
| Age <11 yr                               | Age >10          | 1.01             | 0.55, 1.85 | 1.14                    | 0.59, 2.22  |
| Male                                     | Female           | 1.13             | 0.84, 1.52 | 1.27                    | 0.87, 1.83  |
| White                                    | African Amer.    | 0.76             | 0.44, 1.30 | 0.75                    | 0.35, 1.62  |
| Hispanic                                 | African Amer.    | 1.60             | 0.84, 3.07 | 1.10                    | 0.44, 2.79  |
| Other                                    | African Amer.    | 1.03             | 0.53, 2.00 | 1.16                    | 0.48, 2.83  |
| Same water use: 5-10 days                | 0-4 days         | 1.18             | 0.75, 1.87 | 0.94                    | 0.52, 1.70  |
| Same water use: >10 days                 | 0-4 days         | 0.99             | 0.61, 1.61 | 0.75                    | 0.38, 1.47  |
| Perceived risk of CAWS recreation        | 0-10 scale       | 1.01             | 0.95, 1.06 | 1.01                    | 0.95, 1.08  |
| Exposure in past 48 hr                   |                  |                  |            |                         |             |
| Dog or cat                               | None             | 1.45*            | 1.05, 2.01 | 1.71*                   | 1.13, 2.59  |
| Other animal contact                     | None             | 1.27             | 0.75, 2.14 | 1.16                    | 0.62, 2.15  |
| Exposure to someone with GI illness‡‡    | None             | 1.48             | 0.80, 2.75 | 1.84                    | 0.87, 3.90  |
| Exposure to someone with resp. illness‡‡ | None             | 1.83*            | 1.30, 2.58 | 1.73*                   | 1.11, 2.67  |
| Chronic GI condition                     | None             | 0.86             | 0.40, 1.87 | 1.45                    | 0.66, 3.18  |
| Chronic resp. condition                  | None             | 1.76*            | 1.09, 2.84 | 1.55                    | 0.85, 2.82  |
| Has diabetes                             | Does not         | 1.36             | 0.62, 2.97 | 0.85                    | 0.26, 2.77  |
| Took antibiotics in past 7 days          | No               | 1.51             | 0.78, 2.92 | 1.36                    | 0.58, 3.18  |
| Prone to infection                       | None             | 0.73             | 0.26, 2.05 | 0.57                    | 0.13, 2.39  |
| Ate/drank, washed hands                  | Didn't eat/drink | 1.07             | 0.64, 1.79 | 0.93                    | 0.55, 1.58  |
| Ate/drank, did not wash hands            | Didn't eat/drink | 1.08             | 0.71, 1.64 | 1.08                    | 0.71, 1.65  |
| Water recr., follow-up days 0-3          | None             | 0.83             | 0.59, 1.16 | 0.89                    | 0.60, 1.33  |
| Canoeing                                 | Motor boating    |                  |            | 0.72                    | 0.39, 1.33  |
| Kayaking/rafting                         | Motor boating    |                  |            | 0.58                    | 0.32, 1.07  |
| Rowing                                   | Motor boating    |                  |            | 0.76                    | 0.35, 1.67  |
| Fishing                                  | Motor boating    |                  |            | 1.24                    | 0.65, 2.38  |
| Swallowed ≥mouthful of water             | Did not          |                  |            | 10.89**                 | 2.95, 40.20 |

\* P <0.05 \*\* P<0.001

‡ ‡ Past 72 hours

**Supplementary Material, Table 2c: results of multivariate logistic regression model of**

**ear symptoms**

| <b>Covariate</b>                      | <b>Reference /scale</b> | <b>All recreation groups</b> |               | <b>Water recreation<br/>Groups only</b> |               |
|---------------------------------------|-------------------------|------------------------------|---------------|-----------------------------------------|---------------|
|                                       |                         | <b>AOR</b>                   | <b>95% CI</b> | <b>AOR</b>                              | <b>95% CI</b> |
| CAWS                                  | UNX                     | 1.20                         | 0.70, 2.07    |                                         |               |
| G UW                                  | UNX                     | 1.13                         | 0.63, 2.01    |                                         |               |
| CAWS                                  | G UW                    |                              |               | 1.03                                    | 0.65, 1.63    |
| Age ≤10 yr                            | 11-64 yrs               | 1.18                         | 0.59, 2.36    | 1.14                                    | 0.50, 2.59    |
| Age ≥65 yrs                           | 11-64 yrs               | 0.19                         | 0.03, 1.39    | 0.31                                    | 0.04, 2.29    |
| Male                                  | Female                  | 0.69*                        | 0.48, 0.99    | 0.66                                    | 0.43, 1.02    |
| White                                 | African Amer.           | 0.79                         | 0.42, 1.49    | 0.63                                    | 0.27, 1.45    |
| Hispanic                              | African Amer.           | 1.25                         | 0.56, 2.78    | 0.67                                    | 0.22, 2.04    |
| Other                                 | African Amer.           | 0.47                         | 0.18, 1.22    | 0.38                                    | 0.12, 1.24    |
| Same water use: 5-10 days             | 0-4 days                | 1.59                         | 0.96, 2.64    | 1.45                                    | 0.79, 2.68    |
| Same water use: >10 days              | 0-4 days                | 1.26                         | 0.74, 2.16    | 1.15                                    | 0.59, 2.24    |
| Exposure to person w/ GI illness ‡‡   | None                    | 2.34*                        | 1.22, 4.48    | 2.52*                                   | 1.12, 5.67    |
| Exposure to person w/ resp. illness‡‡ | None                    | 0.87                         | 0.55, 1.38    | 0.73                                    | 0.40, 1.34    |
| Prone to infection                    | No                      | 2.13                         | 0.97, 4.67    | 0.91                                    | 0.22, 3.82    |
| Diabetes                              | No                      | 0.95                         | 0.30, 3.08    | 0.47                                    | 0.06, 3.43    |
| Perceived risk of CAWS recreation     | 0-10 scale              | 1.03                         | 0.96, 1.10    | 1.05                                    | 0.97, 1.14    |
| Ate/drank , washed hands              | Didn't eat/drink        | 0.94                         | 0.50, 1.76    | 0.83                                    | 0.44, 1.58    |
| Ate/drank, did not wash hands         | Didn't eat/drink        | 1.05                         | 0.65, 1.71    | 1.09                                    | 0.66, 1.79    |
| Water recreation, follow-up days 0-3  | None                    | 1.08                         | 0.73, 1.58    | 1.11                                    | 0.70, 1.76    |
| Canoeing                              | Motor boating           |                              | N/A           | 0.72                                    | 0.34, 1.54    |
| Kayaking/rafting                      | Motor boating           |                              | N/A           | 0.60                                    | 0.28, 1.25    |
| Rowing                                | Motor boating           |                              | N/A           | 0.96                                    | 0.41, 2.25    |
| Fishing                               | Motor boating           |                              | N/A           | 1.56                                    | 0.70, 3.47    |
| Face wetness score                    | 0-4 scale               |                              | N/A           | 1.48*                                   | 1.20, 1.84    |

\* P <0.05

‡ ‡ Past 72 hours

**Supplementary Material, Table 2d: results of multivariate logistic regression model of  
eye symptoms**

| Covariate                             |                  | 3-group model |            | Water recreators |            |
|---------------------------------------|------------------|---------------|------------|------------------|------------|
|                                       |                  | AOR           | 95% CI     | AOR              | 95% CI     |
| CAWS                                  | UNX              | 1.50*         | 1.10, 2.06 |                  |            |
| GUW                                   | UNX              | 1.17          | 0.83, 1.65 |                  |            |
| CAWS                                  | GUW              |               |            | 1.34*            | 1.02, 1.77 |
| Age ≤10 yr                            | 11-64 yrs        | 0.22**        | 0.10, 0.49 | 0.20*            | 0.08, 0.56 |
| Age ≥65 yrs                           | 11-64 yrs        | 0.69          | 0.38, 1.25 | 0.85             | 0.41, 1.77 |
| Male                                  | Female           | 1.00          | 0.81, 1.24 | 1.00             | 0.78, 1.29 |
| White                                 | African Amer.    | 0.56*         | 0.40, 0.79 | 0.68             | 0.39, 1.19 |
| Hispanic                              | African Amer.    | 1.06          | 0.68, 1.64 | 1.52             | 0.80, 2.88 |
| Other                                 | African Amer.    | 0.58*         | 0.37, 0.92 | 0.76             | 0.39, 1.48 |
| Same water use: 5-10 days             | 0-4 days         | 1.03          | 0.73, 1.44 | 1.08             | 0.74, 1.58 |
| Same water use: >10 days              | 0-4 days         | 0.77          | 0.54, 1.10 | 0.50*            | 0.30, 0.84 |
| Exposure to person w/ GI illness‡‡    | None             | 1.98*         | 1.29, 3.02 | 1.60             | 0.91, 2.80 |
| Exposure to person w/ resp. illness‡‡ | None             | 0.97          | 0.74, 1.28 | 0.89             | 0.63, 1.26 |
| Exposure to person w/eye sympt..‡‡    | None             | 1.11          | 0.50, 2.45 | 1.54             | 0.59, 3.97 |
| Prone to infection                    | No               | 0.77          | 0.37, 1.58 | 0.71             | 0.29, 1.78 |
| Diabetes                              | No               | 1.33          | 0.74, 2.38 | 0.89             | 0.38, 2.06 |
| Perceived risk of CAWS recreation     | 0-10 scale       | 1.11**        | 1.06, 1.15 | 1.11**           | 1.05, 1.16 |
| Ate/drank , washed hands              | Didn't eat/drink | 1.12          | 0.80, 1.58 | 1.01             | 0.71, 1.44 |
| Ate/drank, did not wash hands         | Didn't eat/drink | 0.96          | 0.72, 1.28 | 0.89             | 0.67, 1.20 |
| Water recreation, follow-up days 0-3  | None             | 1.12          | 0.89, 1.41 | 1.20             | 0.92, 1.57 |
| Canoeing                              | Motor boating    |               | N/A        | 0.64*            | 0.42, 0.97 |
| Kayaking/rafting                      | Motor boating    |               | N/A        | 0.57*            | 0.38, 0.85 |
| Rowing                                | Motor boating    |               | N/A        | 0.55*            | 0.33, 0.92 |
| Fishing                               | Motor boating    |               | N/A        | 0.77             | 0.48, 1.25 |
| Face wetness score                    | 0-4 scale        |               | N/A        | 1.12             | 0.97, 1.29 |
| Hands wetness score                   | 0-4 scale        |               | N/A        | 1.21*            | 1.09, 1.35 |

\* P <0.05 \*\* P<0.001

‡ ‡ Past 72 hours

**Supplementary Material, Table 2e: results of multivariate logistic regression model of**

**skin rash**

| <b>Covariate</b>                     | <b>Ref. /scale</b> | <b><u>3-grp model</u></b> |               | <b><u>Water recreators</u></b> |               |
|--------------------------------------|--------------------|---------------------------|---------------|--------------------------------|---------------|
|                                      |                    | <b>AOR</b>                | <b>95% CI</b> | <b>AOR</b>                     | <b>95% CI</b> |
| CAWS                                 | UNX                | 0.86                      | 0.64, 1.15    |                                |               |
| GUW                                  | UNX                | 0.72*                     | 0.52, 1.00    |                                |               |
| CAWS                                 | GUW                |                           |               | 1.18                           | 0.91, 1.54    |
| Age ≤10 yr                           | 11-64 yrs          | 1.28                      | 0.91, 1.81    | 1.22                           | 0.78, 1.91    |
| Age ≥65 yrs                          | 11-64 yrs          | 0.52                      | 0.26, 1.02    | 0.54                           | 0.22, 1.34    |
| Male                                 | Female             | 0.86                      | 0.71, 1.05    | 0.87                           | 0.68, 1.10    |
| White                                | African Amer.      | 0.63*                     | 0.45, 0.88    | 0.59                           | 0.34, 1.01    |
| Hispanic                             | African Amer.      | 0.77                      | 0.48, 1.22    | 0.88                           | 0.46, 1.70    |
| Other                                | African Amer.      | 1.21                      | 0.82, 1.79    | 1.10                           | 0.60, 2.01    |
| Same water use: 5-10 days            | 0-4 days           | 0.76                      | 0.54, 1.09    | 0.79                           | 0.52, 1.21    |
| Same water use: >10 days             | 0-4 days           | 0.99                      | 0.73, 1.35    | 0.74                           | 0.48, 1.14    |
| Contact with dog or cat‡             | None               | 0.93                      | 0.76, 1.15    | 0.98                           | 0.76, 1.26    |
| Antibiotic use, past 7 days          | None               | 1.36                      | 0.89, 2.08    | 1.33                           | 0.78, 2.26    |
| Sunburn at time of enrollment        | None               | 1.73**                    | 1.31, 2.27    | 1.71*                          | 1.26, 2.33    |
| Cuts at the time of enrollment       | None               | 1.33*                     | 1.06, 1.67    | 1.31                           | 1.00, 1.72    |
| Bug bites at time of enrollment      | None               | 2.25**                    | 1.82, 2.78    | 2.20**                         | 1.71, 2.83    |
| Ate shellfish/sushi ‡                | None               | 0.90                      | 0.60, 1.36    | 1.03                           | 0.63, 1.69    |
| Prone to infection                   | No                 | 1.86*                     | 1.16, 2.98    | 1.64                           | 0.86, 3.11    |
| Diabetic                             | No                 | 1.17                      | 0.65, 2.10    | 1.18                           | 0.56, 2.48    |
| Perceived risk of CAWS recreation    | 0-10 scale         | 1.03                      | 0.99, 1.07    | 1.02                           | 0.97, 1.07    |
| Ate/drank, washed hands              | Didn't eat/drink   | 0.82                      | 0.57, 1.19    | 0.79                           | 0.54, 1.16    |
| Ate/drank, did not wash hands        | Didn't eat/drink   | 1.13                      | 0.86, 1.49    | 1.14                           | 0.86, 1.51    |
| Water recreation, follow-up days 0-3 | None               | 1.34*                     | 1.06, 1.69    | 1.38*                          | 1.03, 1.84    |
| Canoeing                             | Motor boating      |                           | N/A           | 0.75                           | 0.48, 1.16    |
| Kayaking/rafting                     | Motor boating      |                           | N/A           | 0.80                           | 0.52, 1.23    |
| Rowing                               | Motor boating      |                           | N/A           | 0.98                           | 0.60, 1.61    |
| Fishing                              | Motor boating      |                           | N/A           | 1.00                           | 0.62, 1.61    |
| Wetness score                        | 0-16 scale         |                           | N/A           | 1.02                           | 0.98, 1.06    |

\* P <0.05 \*\* P<0.001

‡ Past 48 hours prior to enrollment

**Supplementary Material, Table 3: alternative definitions of exposure in analyses of 2-group models of AGI**

| <b>Variable for water exposure</b>      | <b>AGI and exposure<br/>OR (95% CI)</b> | <b>AGI and group<br/>OR (95% CI)</b> |
|-----------------------------------------|-----------------------------------------|--------------------------------------|
| <b>Face/head wetness</b>                |                                         |                                      |
| None vs. any                            | 1.59 (1.23, 2.05)                       | 0.97 (0.74, 1.22 )                   |
| None, drop vs. splash, drench, submerge | 1.85 (1.38, 2.47)                       | 1.01 (0.79, 1.30)                    |
| None, drop, splash vs. drench, submerge | 2.25 (1.28, 3.95)                       | 1.05 (0.82, 1.35)                    |
| None, drop, splash, drench vs. submerge | 2.41 (1.25, 4.69)                       | 1.05 (0.82, 1.35)                    |
| <b>Swallow water</b>                    |                                         |                                      |
| None vs. any                            | 1.57 (0.94, 2.63)                       | 1.01 (0.78, 1.29)                    |
| None, drop vs. teaspoon, mouthful       | 2.79 (1.41, 5.53)                       | 1.02 (0.79, 1.31)                    |
| None, drop, teaspoon vs. mouthful       | 5.74 (2.05, 16.0)                       | 1.02 (0.80, 1.31)                    |

All associations were obtained from the multivariate model presented in Supplementary Material Table 2a. The seven sets of results presented here were from separate models, each using a different exposure term.



**Supplementary Material Figures 1a and 1b: CHEERS recruiting locations**

**Recruiting locations on the CAWS and nearby G UW locations are presented in the following two figures (CHEERS North Side and CHEERS South Side). Additional G UW recruiting locations were the Fox River, Des Plaines River, Du Page River, as well as at the following inland lakes: Busse Woods, Crystal Lake, Lake Arlington, Maple Lake, Mastodon Lake, the Skokie Lagoons and Tampier Lake.**

# CHEERS North Side

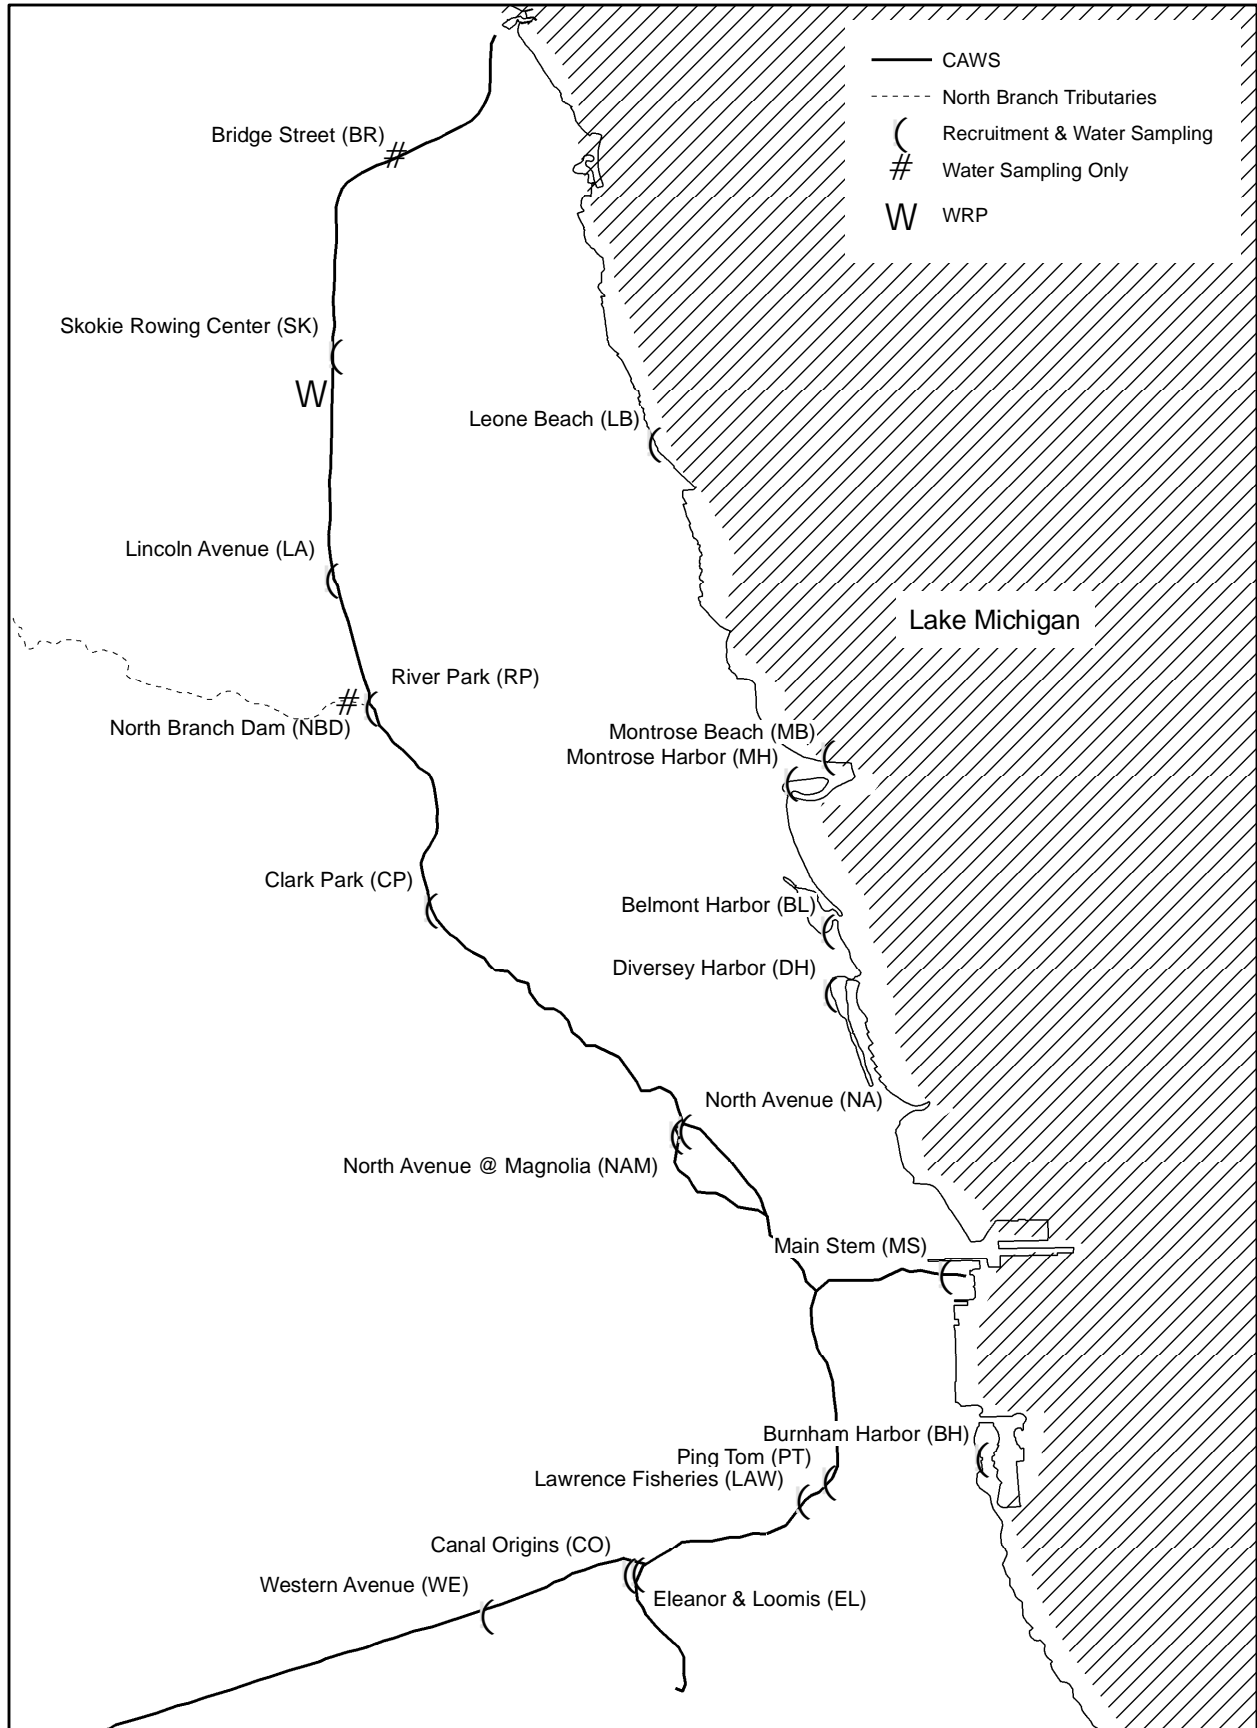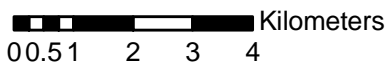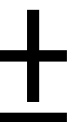

# CHEERS South Side

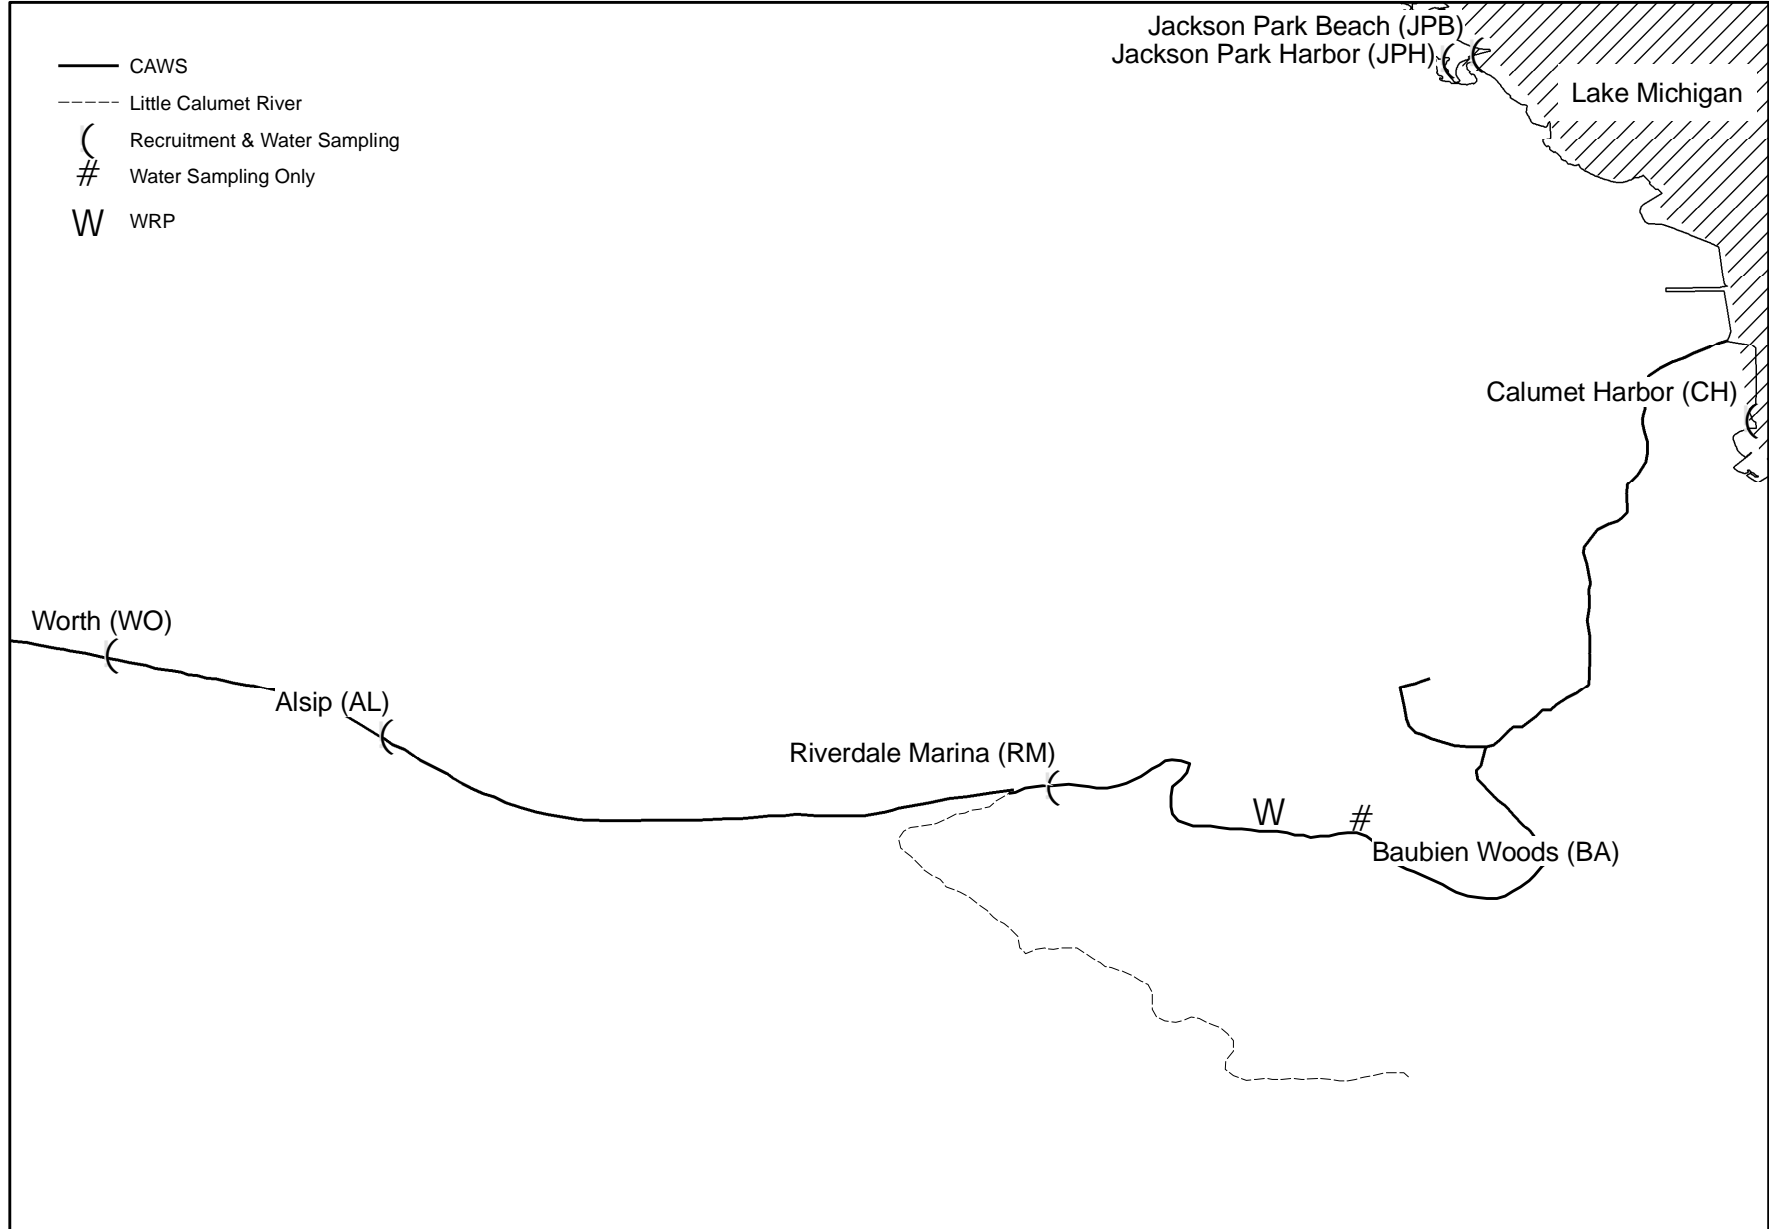

00.51 2 3 4 Kilometers

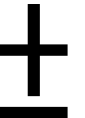

**Supplementary Material Figure 2: Participant Enrolment and Attrition**

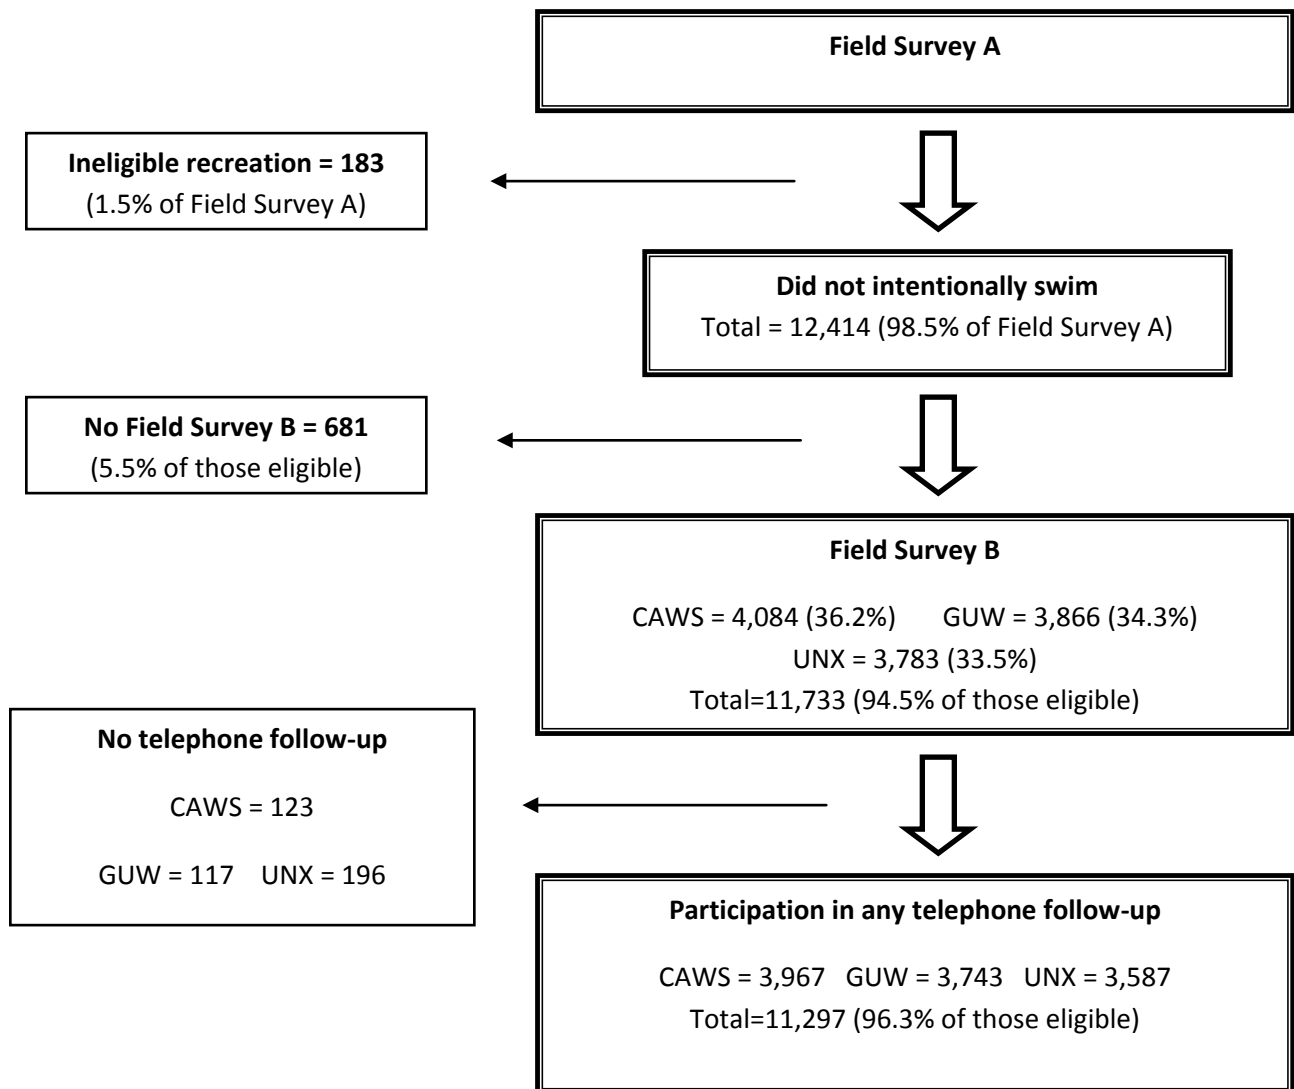

**Supplementary material Figure 3a: Survival curve, acute respiratory illness (ARI)**

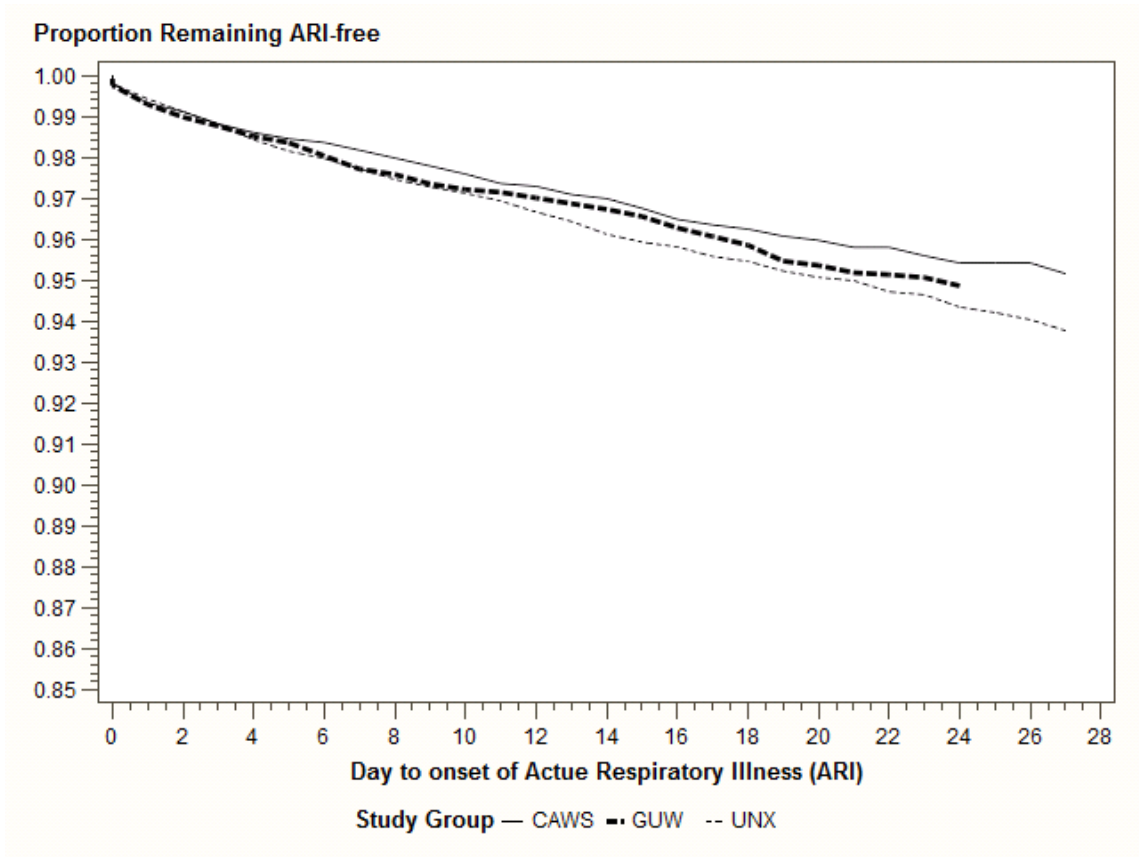

**Supplementary material Figure 3b: Survival curve, ear symptoms**

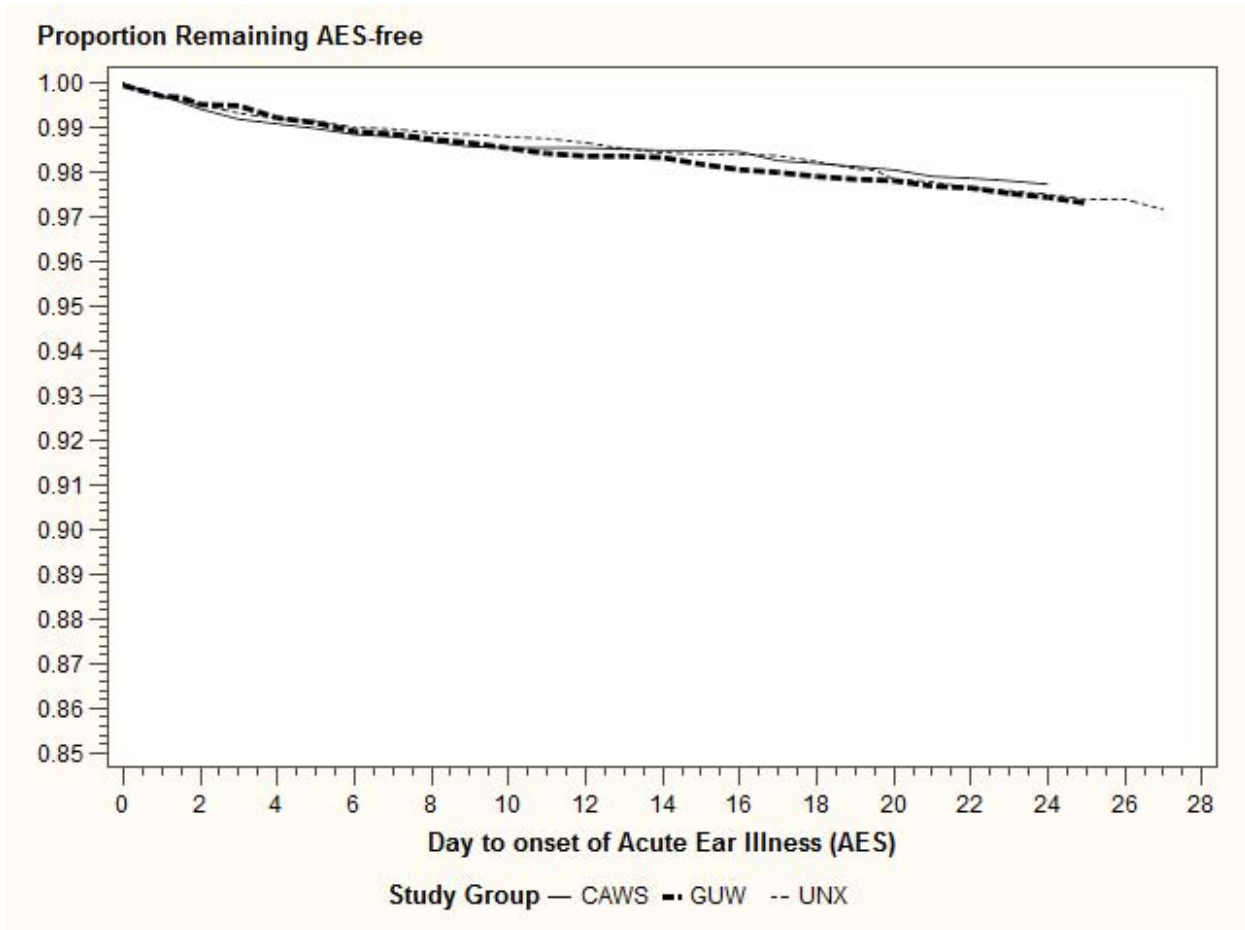

**Supplementary material Figure 3c: Survival curve, eye symptoms**

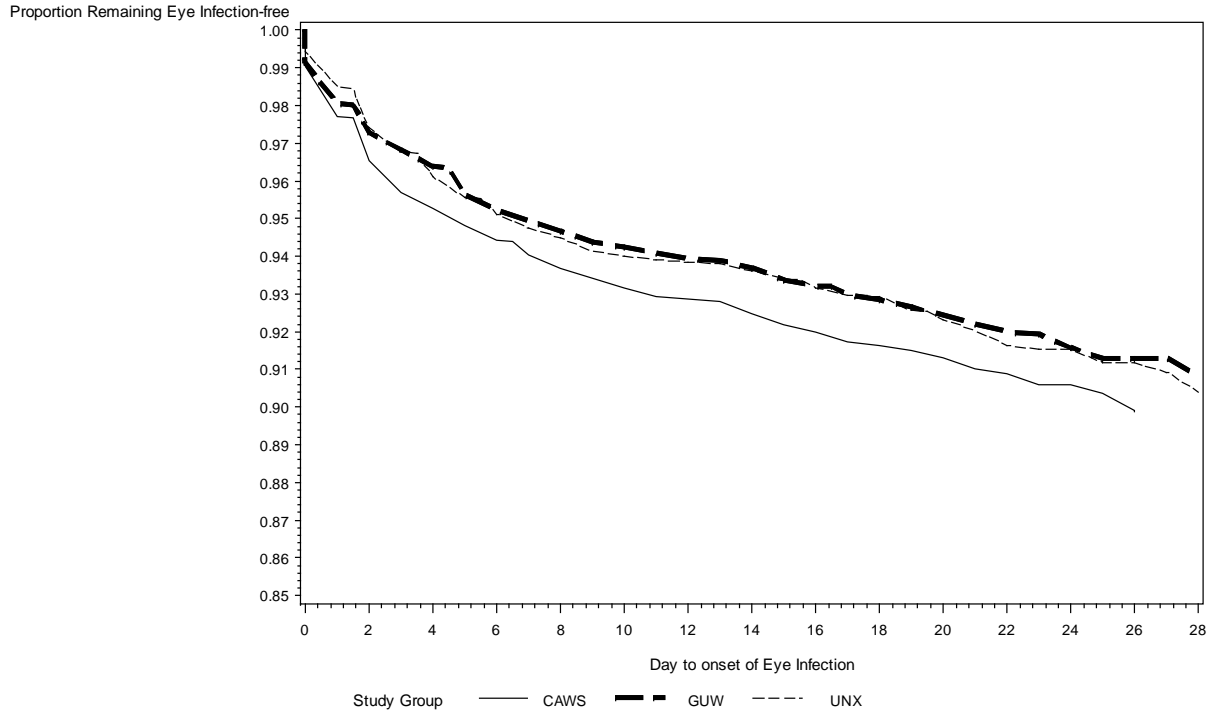

**Days to onset of eye symptoms**

**Supplementary material Figure 3d: Survival curve, skin rash**

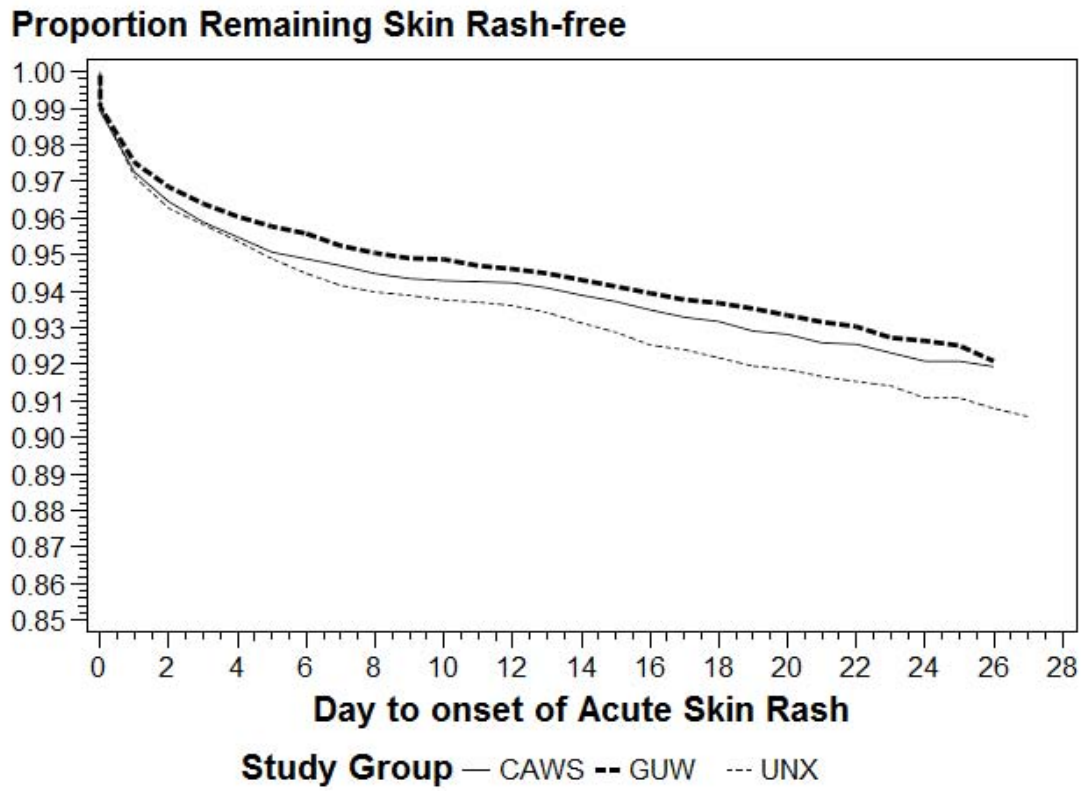

Supplement: ehp.1103934.s001.pdf [file ehp.1103934.s001.pdf]
